# Supplementary material
Source: PubMed Central journal article supplement (PMC5602894)

# Supplemental Figure 1

A) paired test p-value =  $5.87e-03$

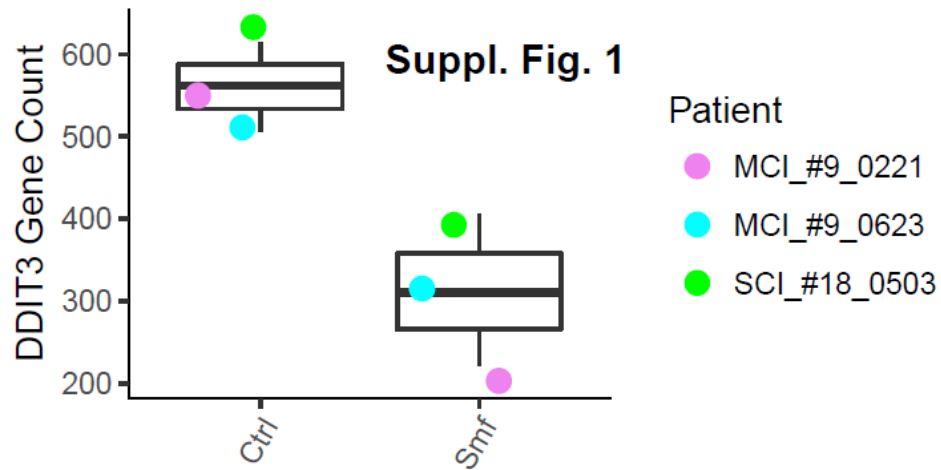

B) paired test p-value =  $4.76e-03$

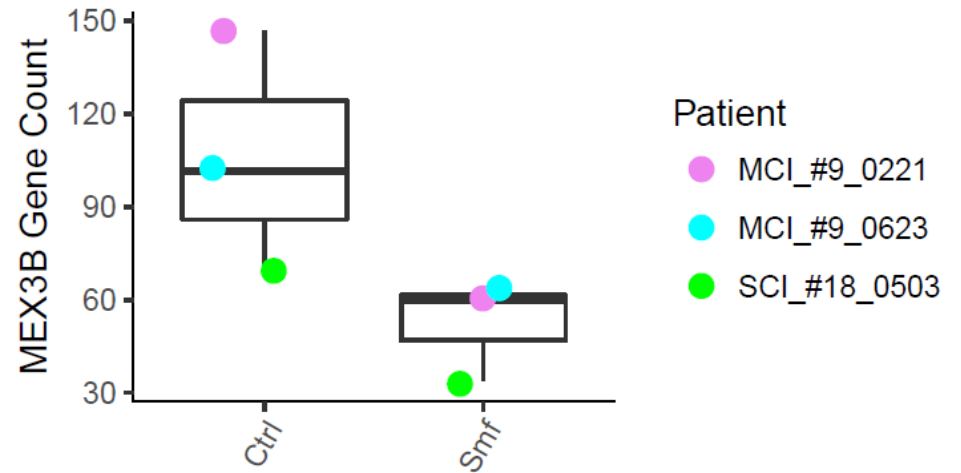

C) paired test p-value =  $3.51e-03$

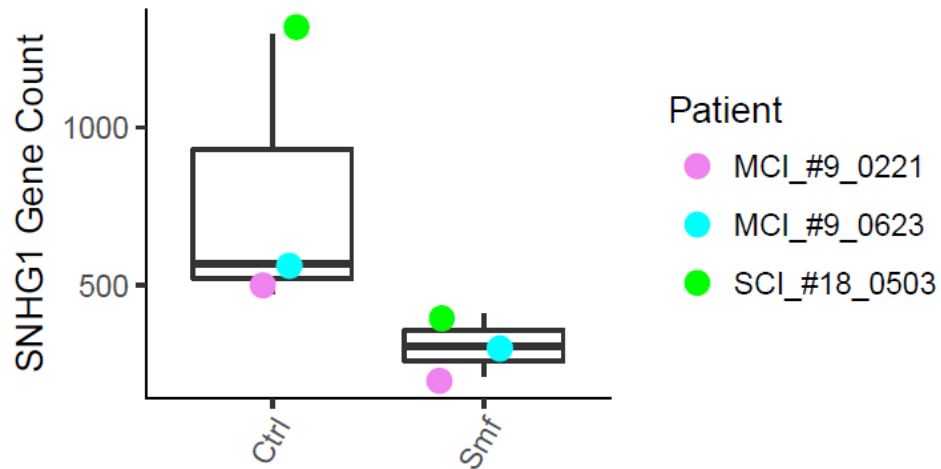

D) paired test p-value =  $1.74e-04$

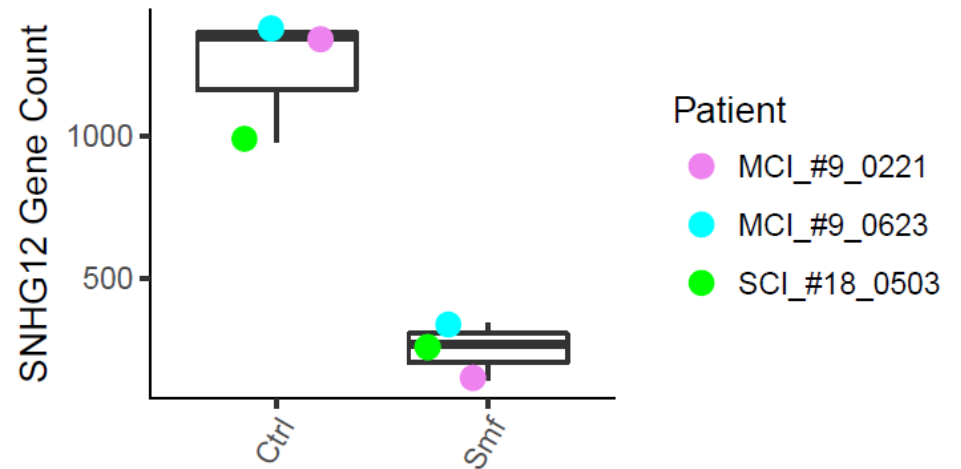

Supplement: fj.201700290R.sf1.pdf [file fj.201700290R.sf1.pdf]
