# Supplementary material
Source: PubMed Central journal article supplement (PMC5602894)

## Supplemental Figure 2

A) paired test p-value =  $8.09 \times 10^{-3}$

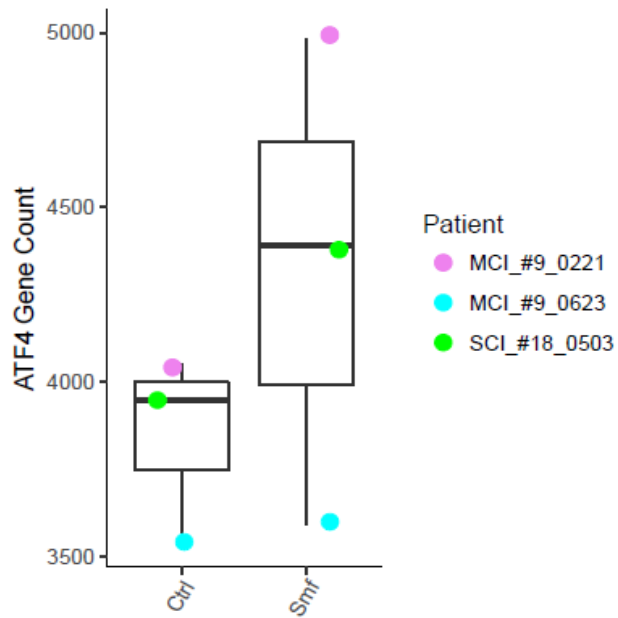

B) paired test p-value =  $1.43 \times 10^{-4}$

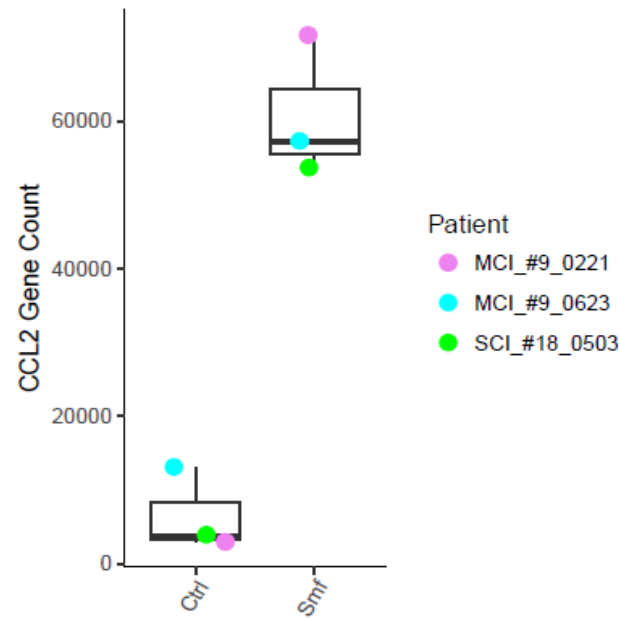

C) paired test p-value =  $7.34 \times 10^{-8}$

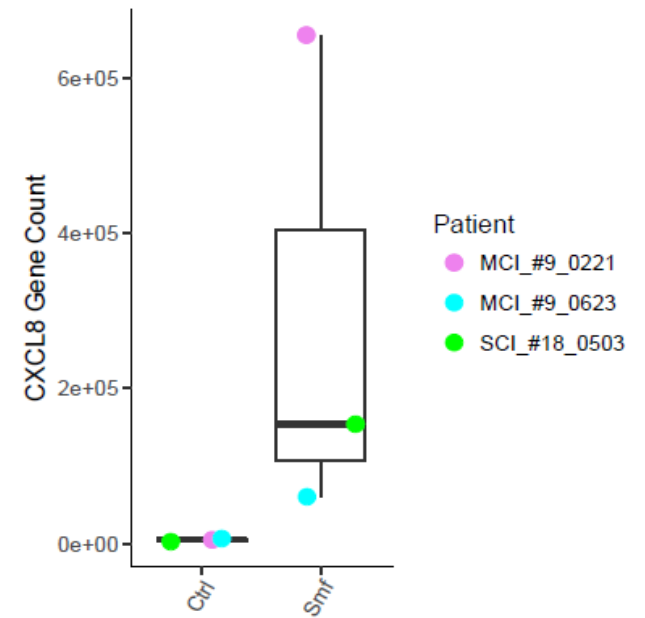

D) paired test p-value =  $2.6 \times 10^{-3}$

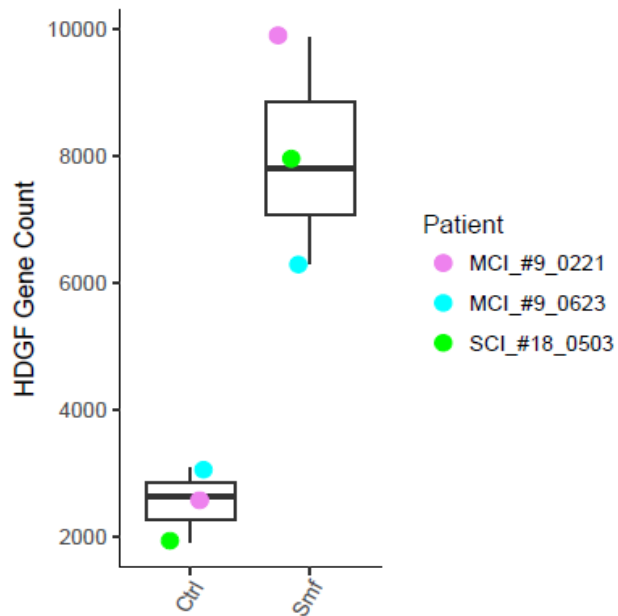

E) paired test p-value =  $7.34 \times 10^{-4}$

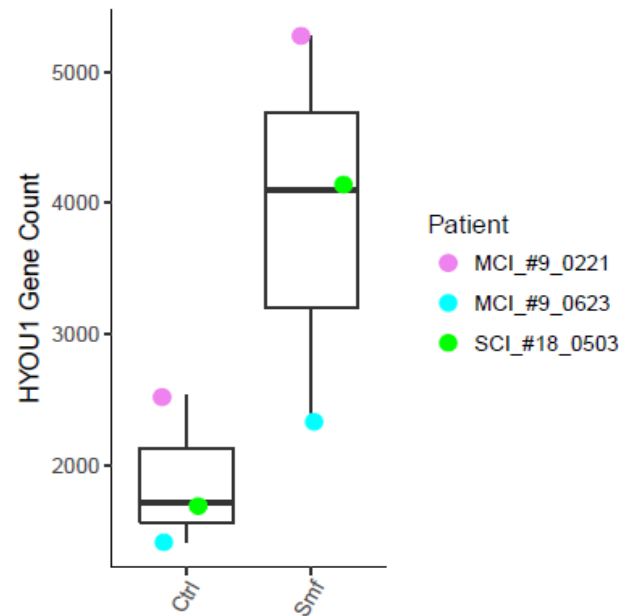

F) paired test p-value =  $5.07 \times 10^{-3}$

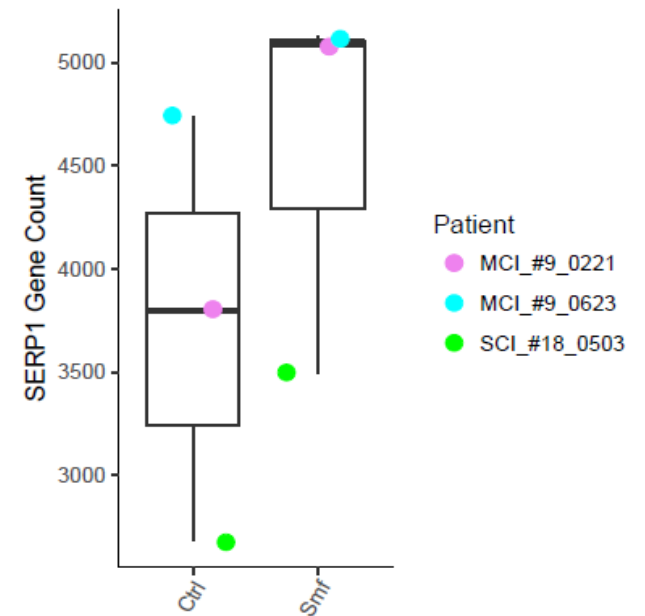

Supplement: fj.201700290R.sf2.pdf [file fj.201700290R.sf2.pdf]
