# Supplementary material
Source: PubMed Central journal article supplement (PMC5602894)

**Suppl. Fig. 1 Top ER stress gene count box plot.** Gene count box plots of select ER stress genes for paired control (Ctrl) and Smart fish (Smf) exposed macrophages with calculated Wilcoxon signed-rank test p-values. A) DDIT3 gene count box plot with a p-value <0.001. B) MEX3B gene count box plot with a p-value <0.01. C) SNHG1 gene count box plot with a p-value <0.01. D) SNHG12 gene count box plot with a p-value <0.001.

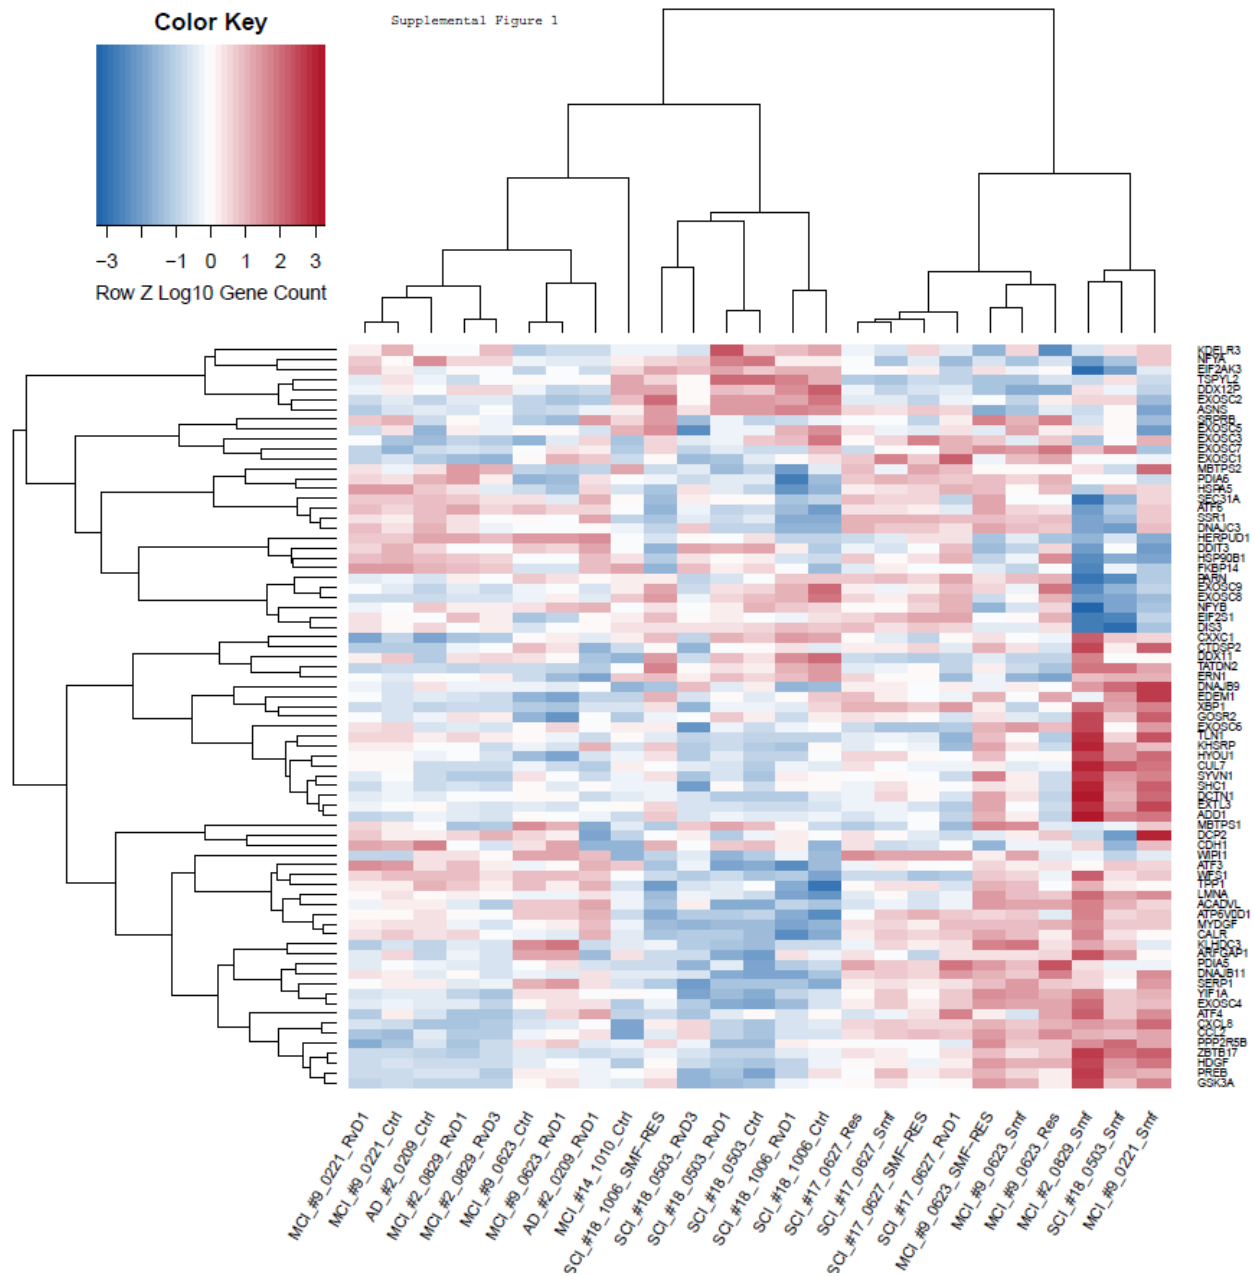

Supplement: supp_fj.201700290R_Supplemental_Figure1.pdf [file supp_fj.201700290R_Supplemental_Figure1.pdf]
