# Supplementary material
Source: PubMed Central journal article supplement (PMC5602894)

**Suppl. Fig. 2 Top UPR gene count box plot.** Gene count box plots of select UPR genes for paired Ctrl and Smf exposed macrophages with calculated Wilcoxon signed-rank test p-values. A) ATF4 gene count box plot with a p-value <0.0081. B) CCL2 gene count box plot with a p-value <0.001. C) CXCL8 gene count box plot with a p-value <0.0001. D) HDGF gene count box plot with a p-value <0.01. E) HYOU1 gene count box plot with a p-value <0.001. F) SERP1 gene count box plot with a p-value of <0.01.

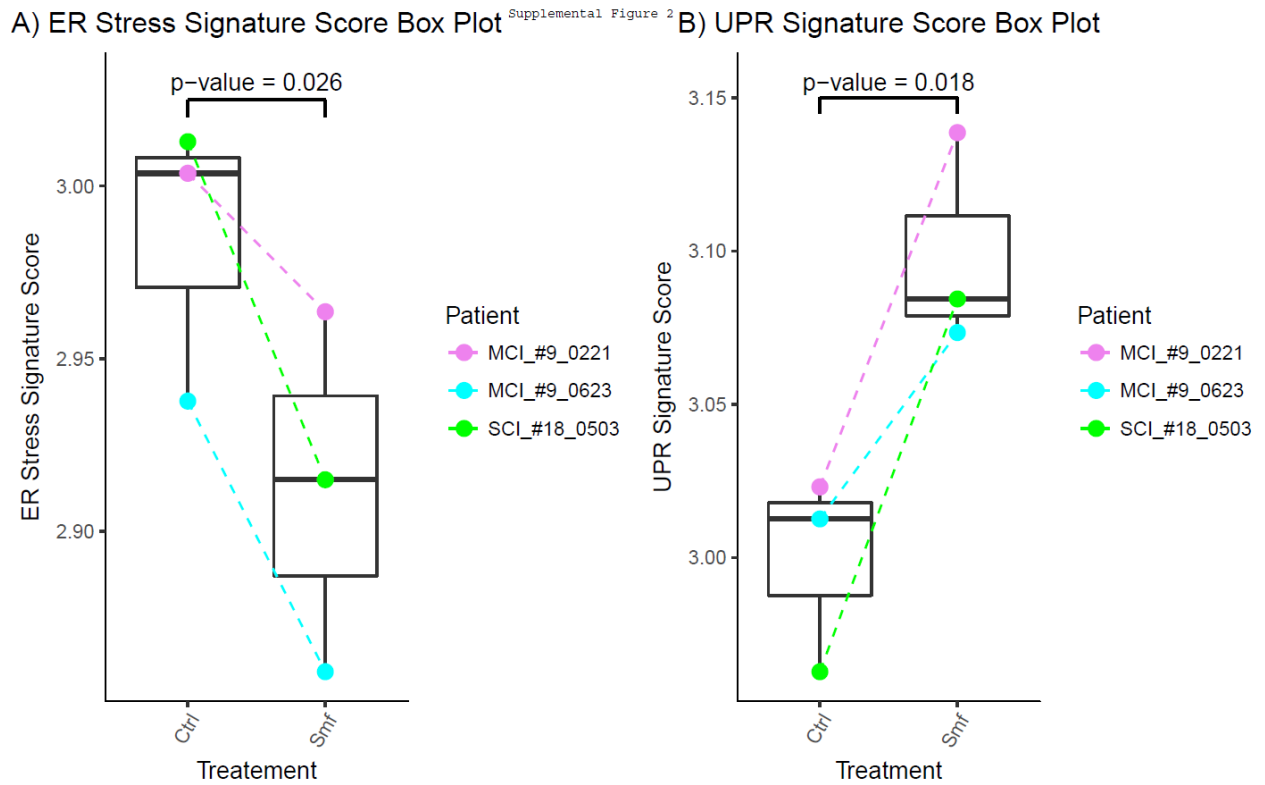

Supplement: supp_fj.201700290R_Supplemental_Figure2.pdf [file supp_fj.201700290R_Supplemental_Figure2.pdf]
