# Supplementary material
Source: PubMed Central journal article supplement (PMC5602894)

### Supplemental Figure 3

A) ER Stress Signature Score Box Plot

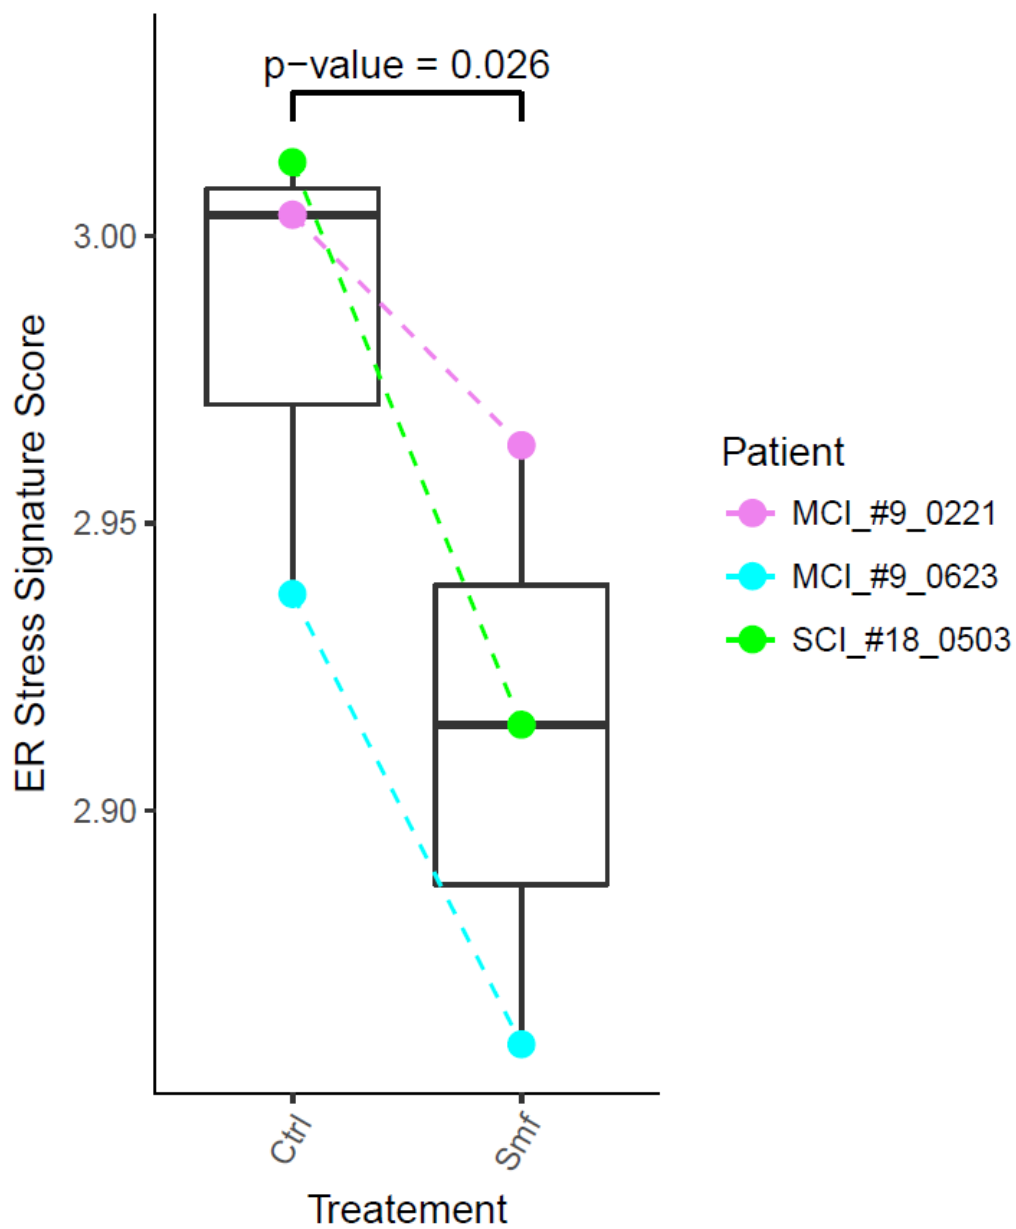

B) UPR Signature Score Box Plot

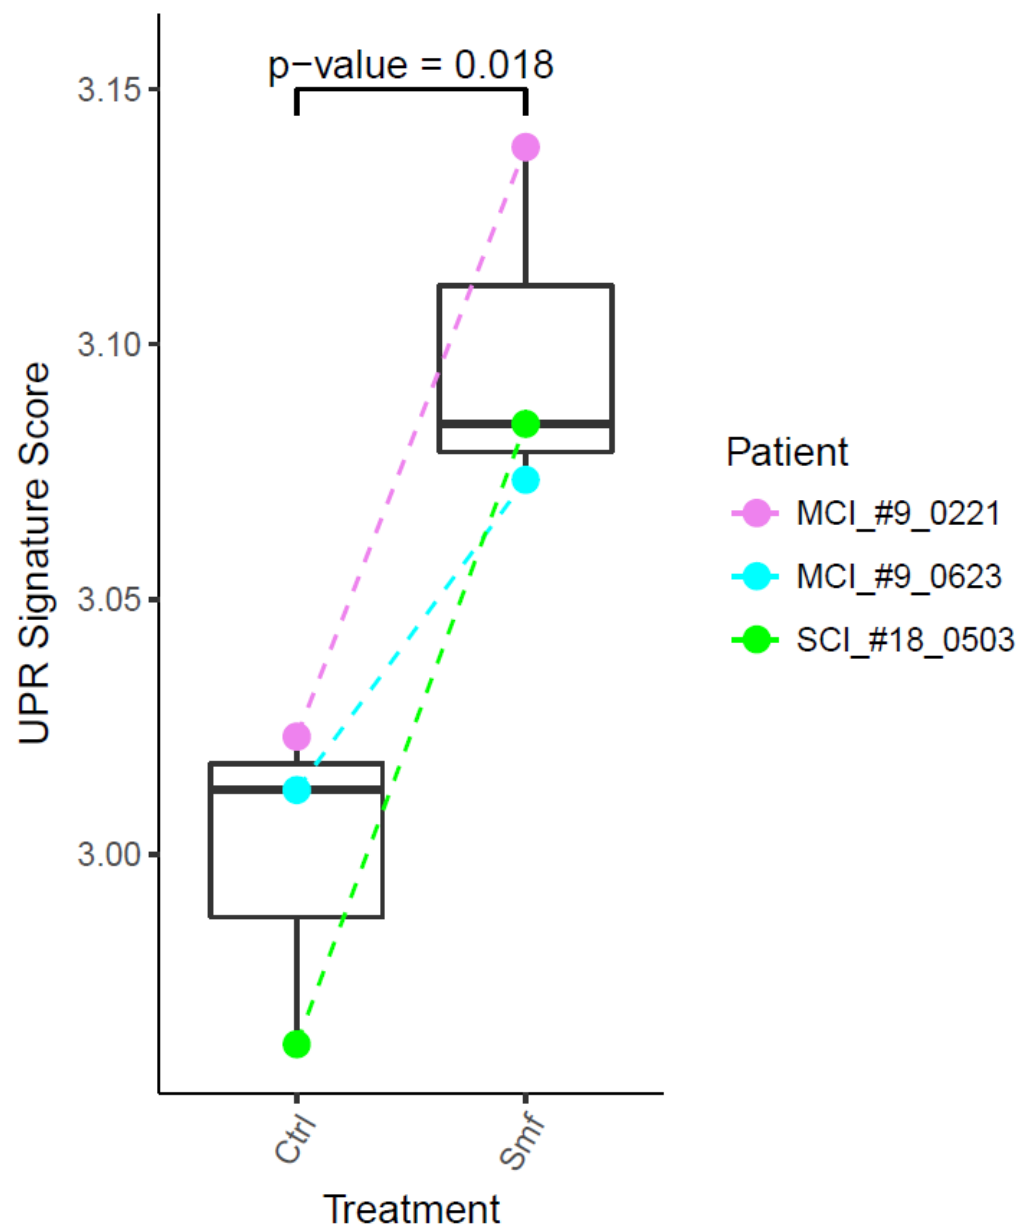

Supplement: fj.201700290R.sf3.pdf [file fj.201700290R.sf3.pdf]
